# Supplementary material for: Quantitative Determination of 3-O-Acetyl-11-Keto-β-Boswellic Acid (AKBA) and Other Boswellic Acids in Boswellia sacra Flueck (syn. B. carteri Birdw) and Boswellia serrata Roxb
Source: PubMed Central journal article supplement (PMC6273064; doi:10.3390/molecules21101329), 2016-10-06
Supplement: molecules-21-01329-s001.pdf [file molecules-21-01329-s001.pdf]

# Supplementary Materials: Quantitative Determination of 3-O-Acetyl-11-Keto- $\beta$ -Boswellic Acid (AKBA) and Other Boswellic Acids in *Boswellia sacra* Flueck (syn. *B. carteri* Birdw) and *Boswellia serrata* Roxb

Giuseppe Mannino, Andrea Occhipinti and Massimo E. Maffei

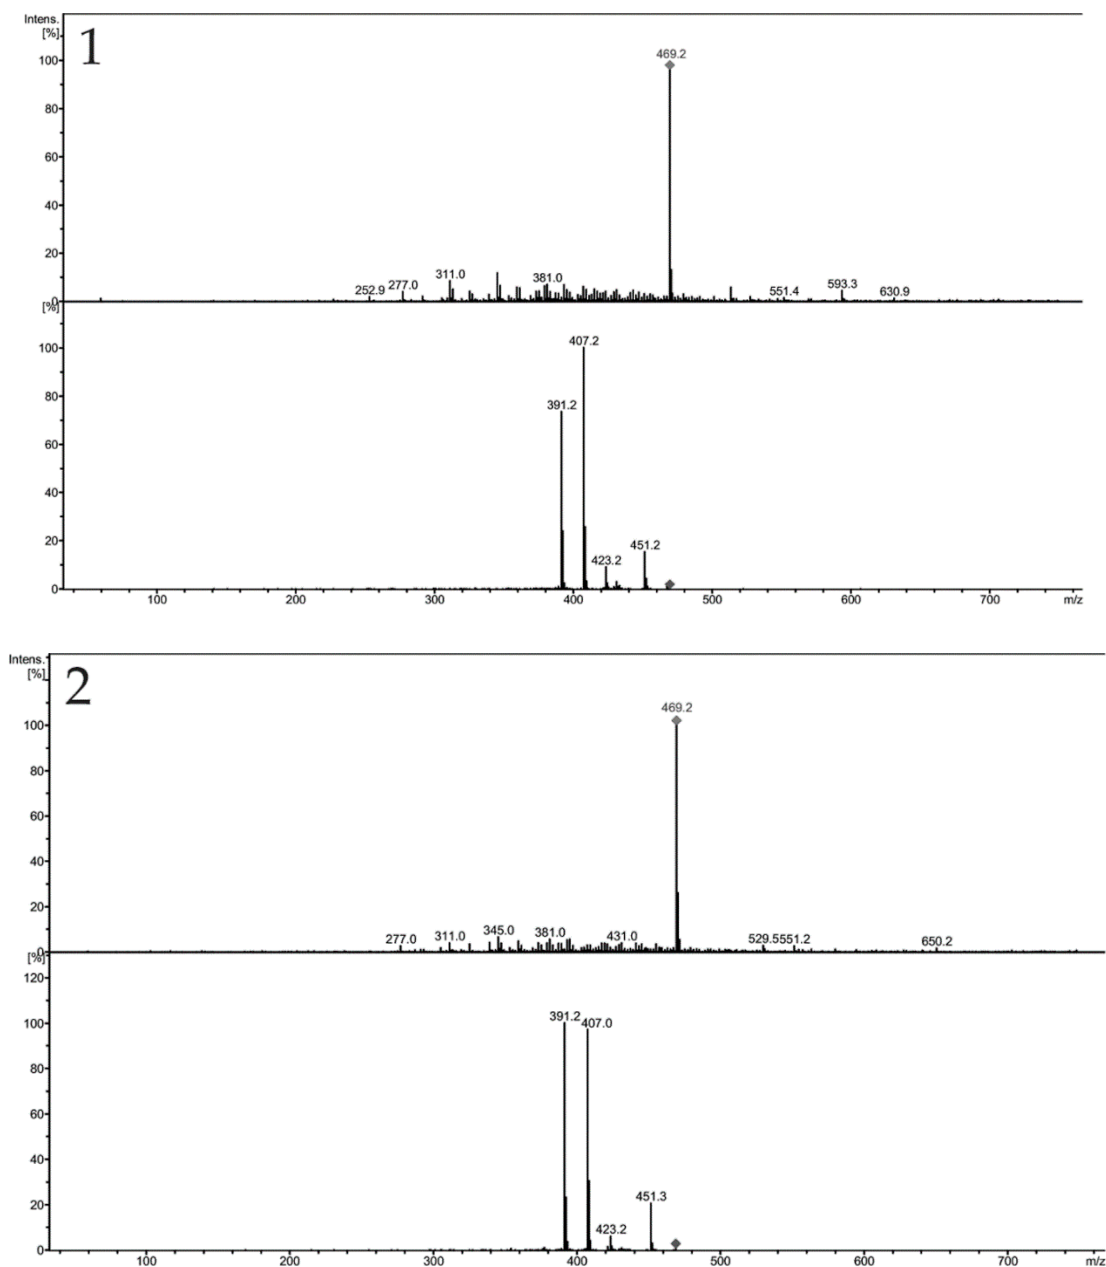

Figure S1. Cont.

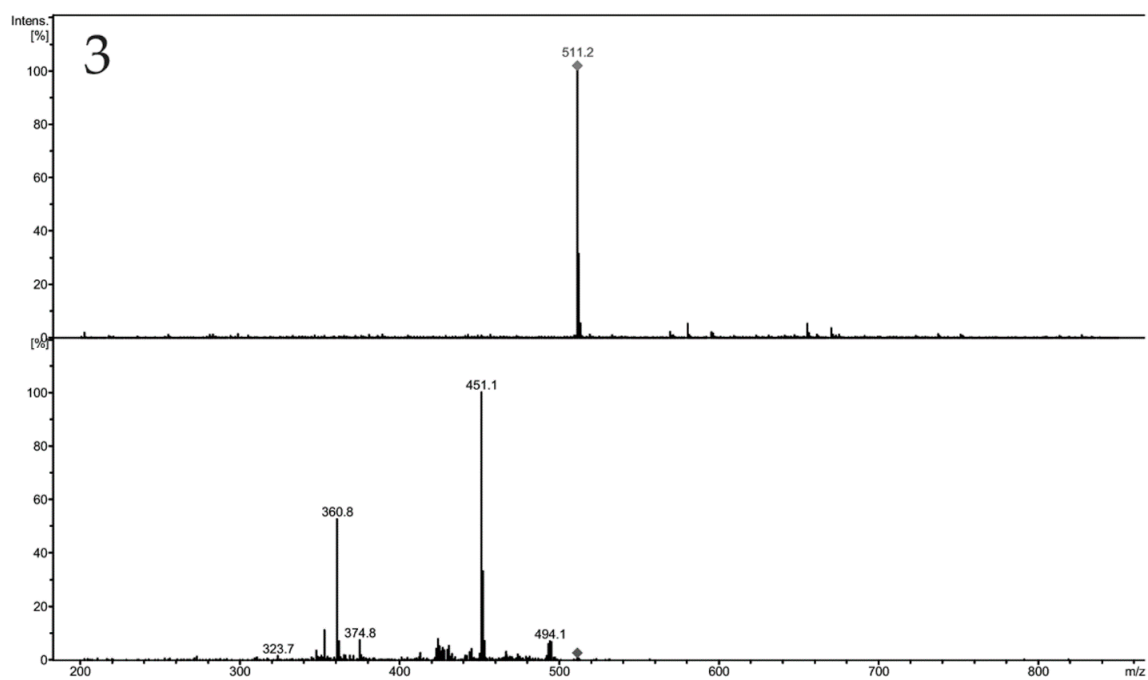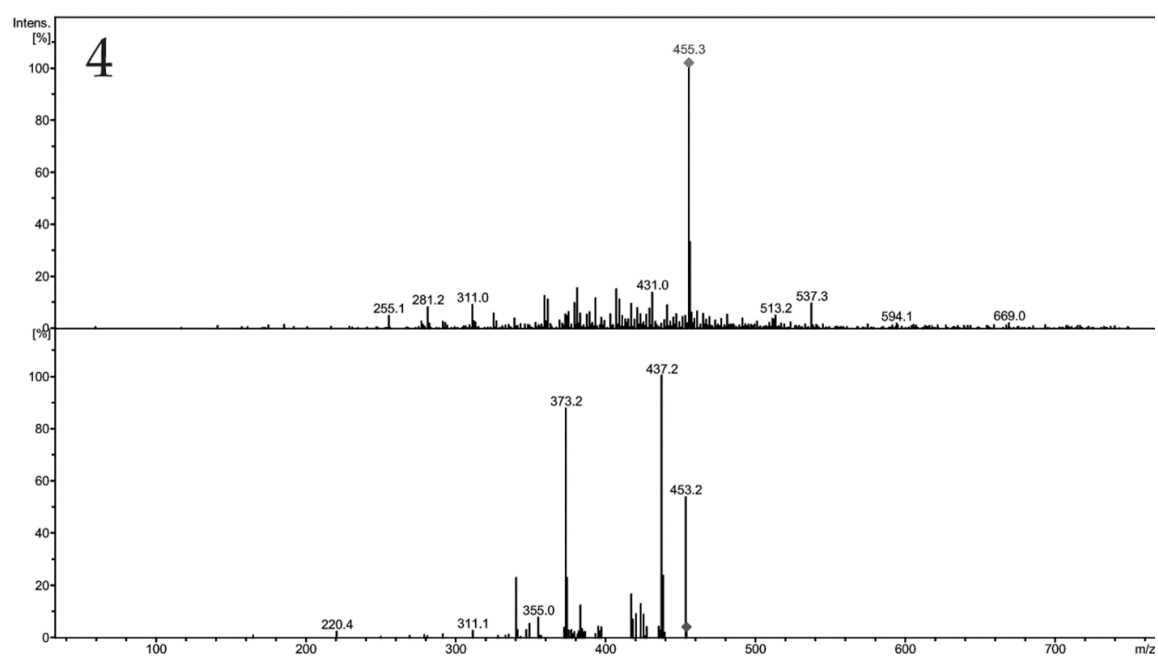

Figure S1. Cont.

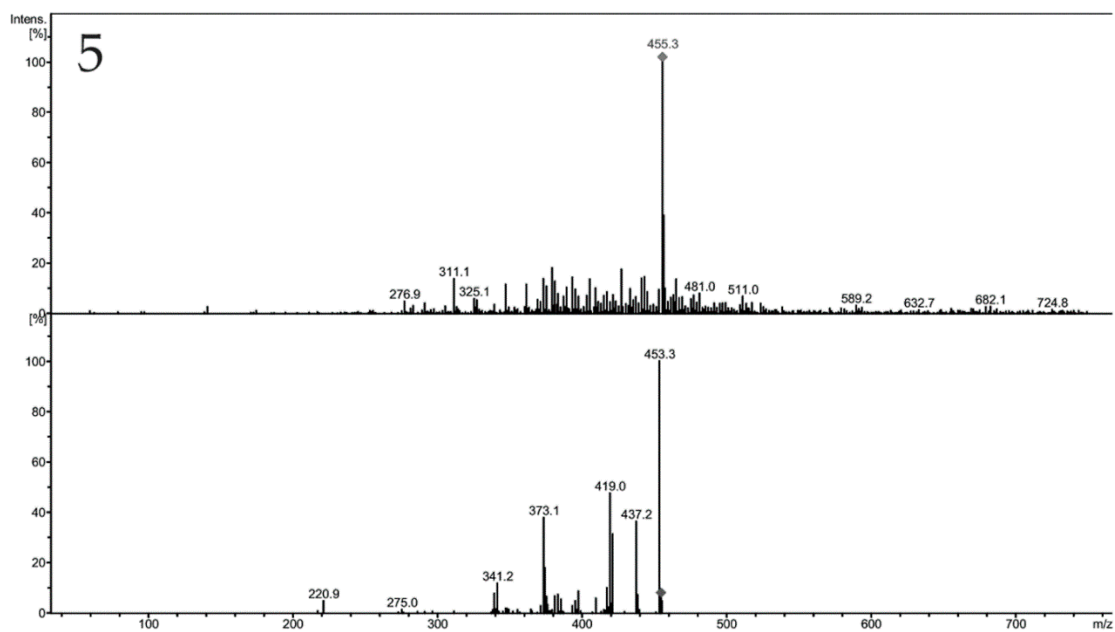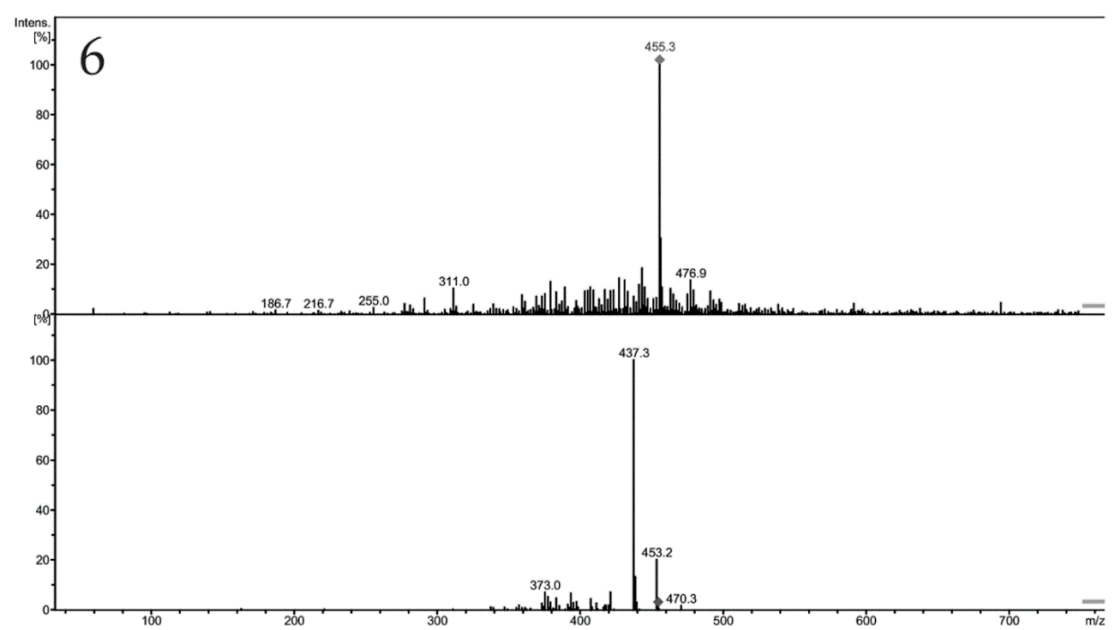

Figure S1. Cont.

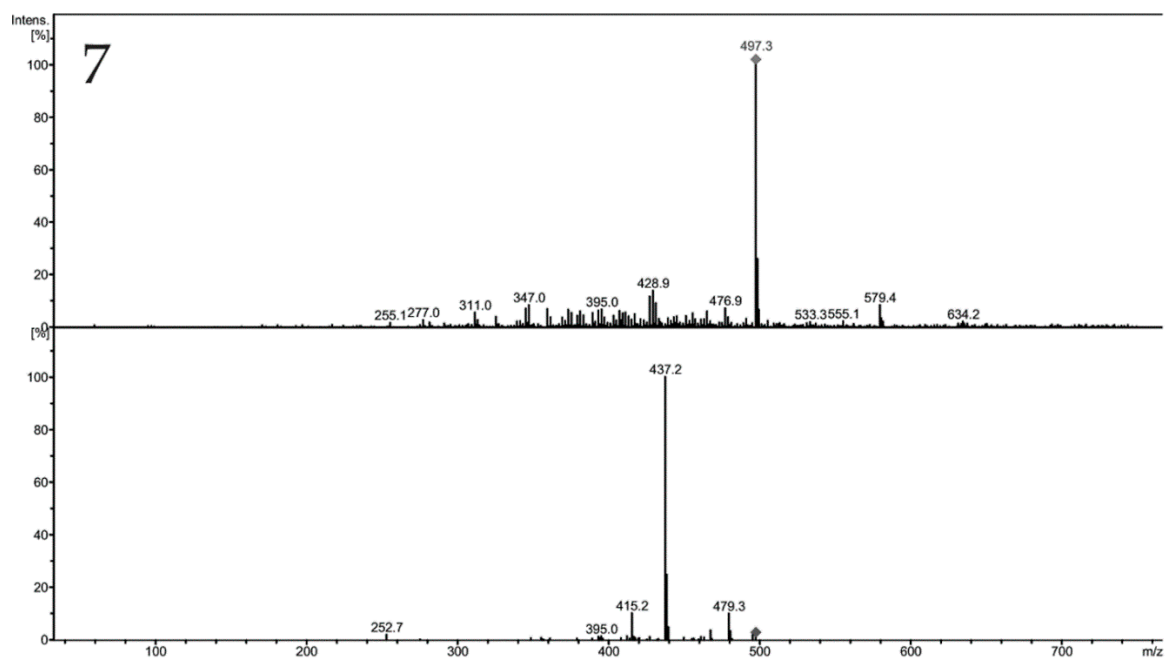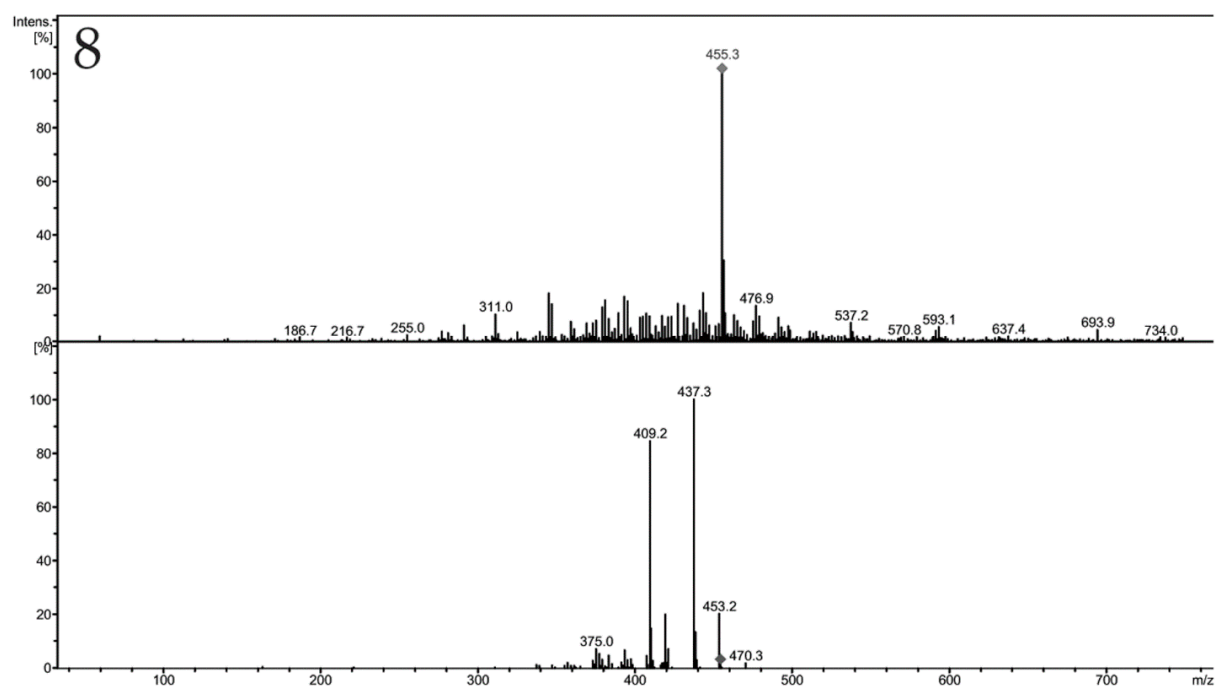

Figure S1. Cont.

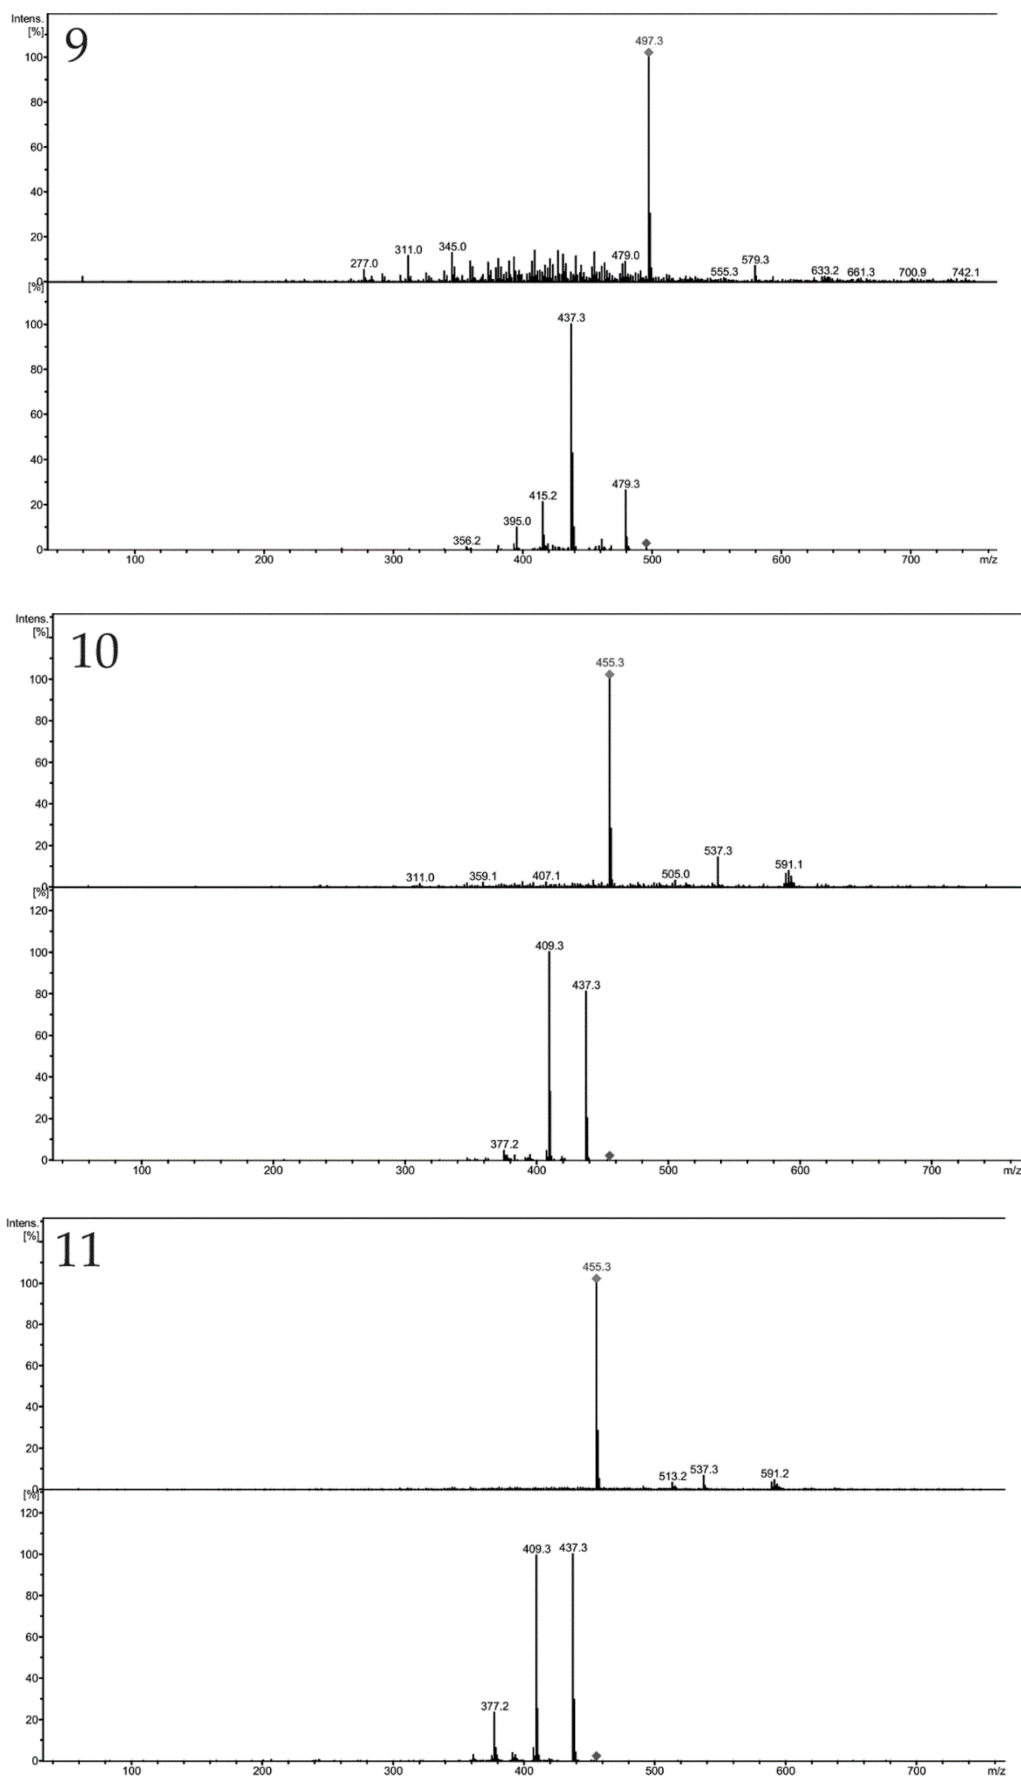

Figure S1. Cont.

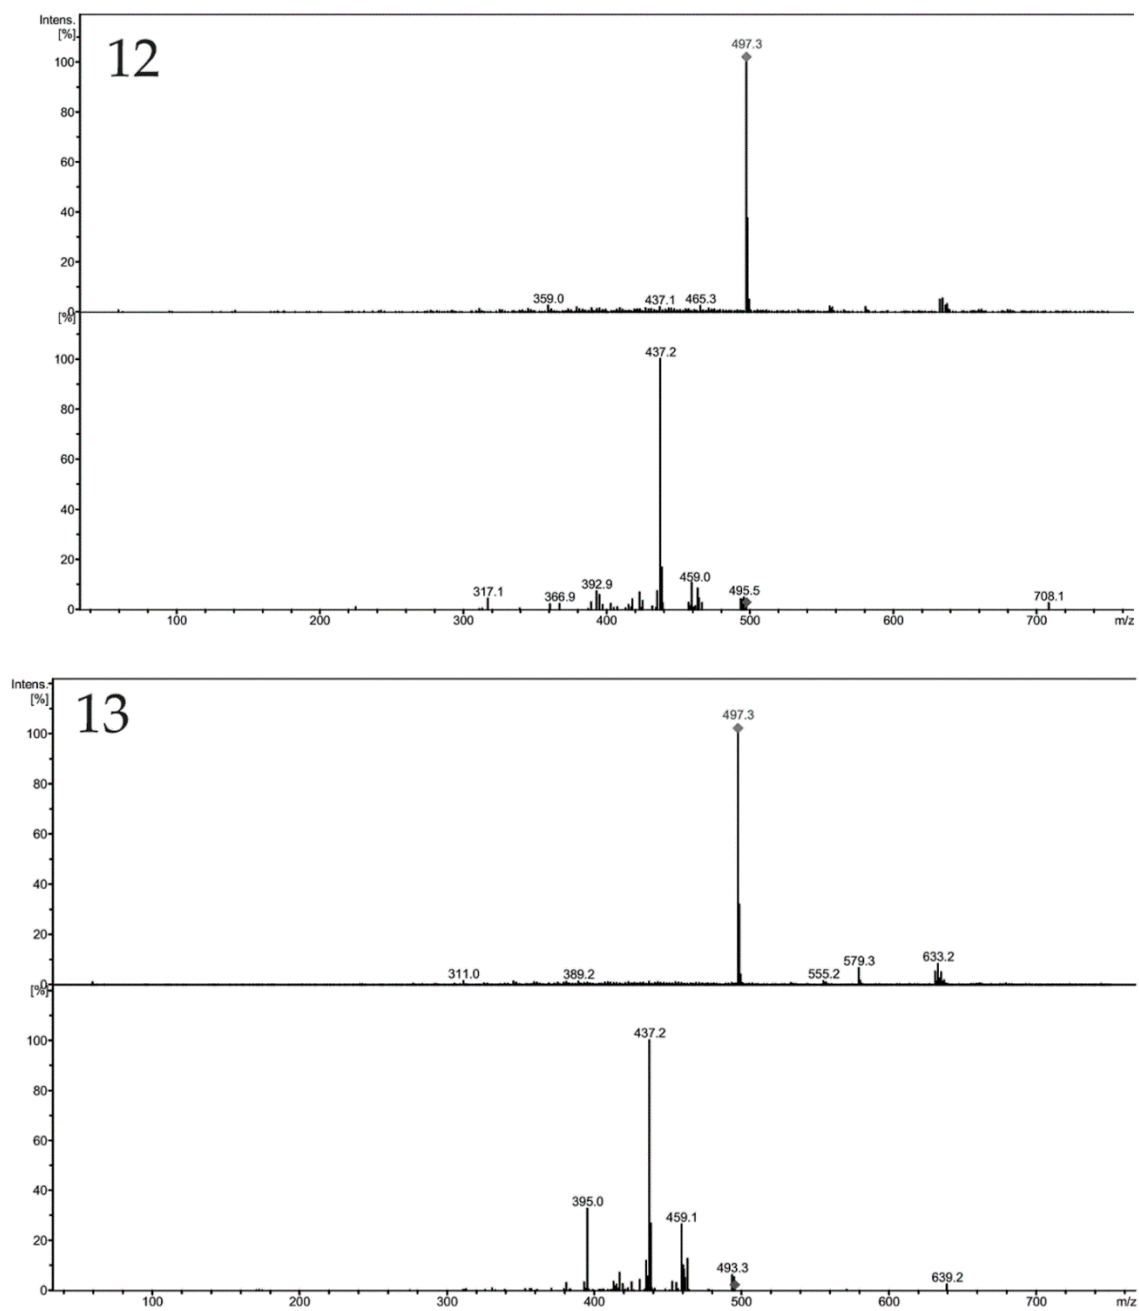

**Figure S1.** Mass spectra (MS<sub>2</sub>) of identified boswellic acids. In each plate, upper left numbers correspond to molecules listed in Table 1.

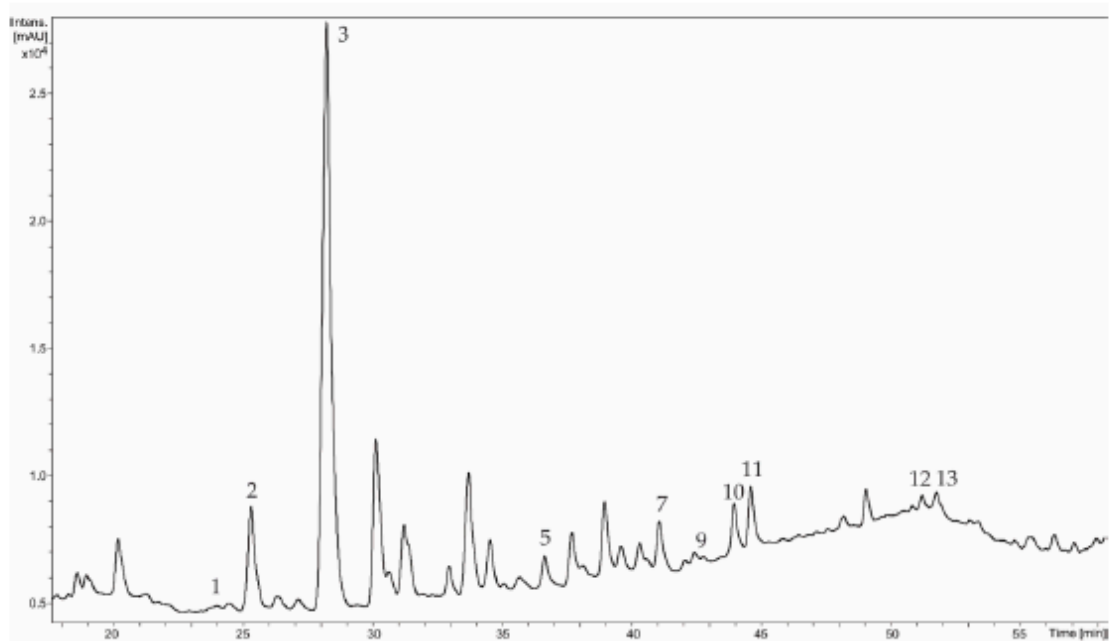

Chromatogram of *Boswellia sacra*. For chromatographic conditions, please refer to Materials and Methods. Peak numbers correspond to compounds listed in Table 1

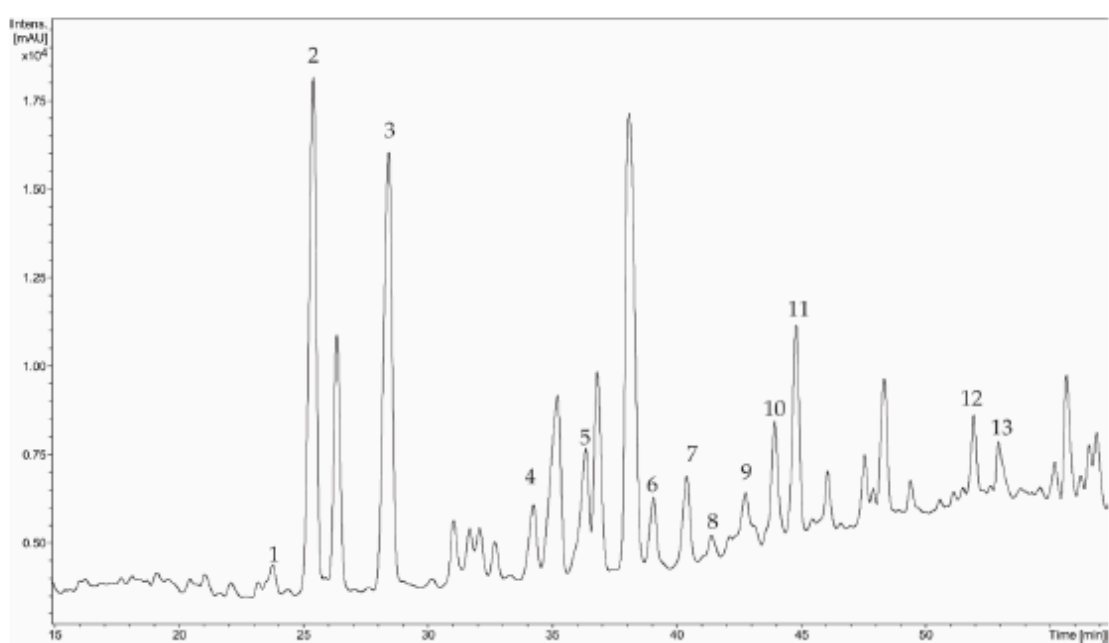

Chromatogram of *Boswellia serrata*. For chromatographic conditions, please refer to Materials and Methods. Peak numbers correspond to compounds listed in Table 1

Figure S2. UV-Chromatograms of *Boswellia sacra* and *Boswellia serrata*.
